# Supplementary material
Source: HighWire-hosted journal article supplement (https://jnis.bmj.com/highwire/filestream/175262/field_highwire_adjunct_files/0/jnis-2022-019598supp001_data_supplement.pdf)

## Supplementary Material

### Supplementary methods

#### Imaging analysis

Standardized multiparametric neuroimaging, including non-contrast head CT (NCCT), CT angiography (CTA) and CT perfusion (CTP), was performed in the emergency room using a 64-slice CT device (Discovery CT750 HD, GE Healthcare, Milwaukee, WI, USA) when patients arrived at the hospital.

The extent of early ischaemic changes was assessed on baseline NCCT using the Alberta Stroke Program Early CT Score (ASPECTS) methodology.<sup>10</sup> Collateral status was determined on maximum intensity projection (MIP) images of CTA using the modified Tan score: good collateral status was defined as collaterals filling  $\geq 50\%$  of the occluded arterial territory, whereas poor collaterals filled  $< 50\%$  of the occluded territory.<sup>1</sup> As described elsewhere, CTP data were analysed automatically by commercially available F-STROKE Software (NeuroBlem, Ltd. Co., version 1.0.7) to generate maps of time to maximum (Tmax), relative cerebral blood volume (rCBV), and relative cerebral blood flow (rCBF) index.<sup>2-3</sup>

#### References:

- 1 Tan JC, Dillon WP, Liu S, *et al.* Systematic comparison of perfusion-CT and CT-angiography in acute stroke patients. *Ann Neurol* 2007;61: 533-543.
- 2 Shi Z, Li J, Zhao M, *et al.* Baseline Cerebral Ischemic Core Quantified by Different Automatic Software and Its Predictive Value for Clinical Outcome. *Front Neurosci* 2021;15: 608799.
- 3 Wang C, Shi Z, Yang M, *et al.* Deep learning-based identification of acute ischemic core and deficit from non-contrast CT and CTA. *J Cereb Blood Flow Metab* 2021;41: 3028-3038.

**Supplementary table 1** List of potential candidate predictors

| Category               | Number of variables | Variables                                                                                  |
|------------------------|---------------------|--------------------------------------------------------------------------------------------|
| Demographics           | 2                   | Age<br>Gender                                                                              |
| Stroke characteristics | 4                   | Baseline NIHSS score<br>Baseline mRS score<br>Site of occlusion<br>Etiology based on TOAST |
| Comorbidities          | and 10              | Hypertension                                                                               |

|                                         |    |                              |
|-----------------------------------------|----|------------------------------|
| lifestyle factors                       |    | Diabetes                     |
|                                         |    | Hyperlipidemia               |
|                                         |    | Atrial fibrillation          |
|                                         |    | Coronary disease             |
|                                         |    | History of TIA or stroke     |
|                                         |    | SBP                          |
|                                         |    | DBP                          |
|                                         |    | Habitual smoking             |
|                                         |    | Alcohol assumption           |
| Radiological findings                   | 9  | ASPECTS                      |
|                                         |    | Collateral status            |
|                                         |    | CBF < 30%                    |
|                                         |    | Tmax > 4s                    |
|                                         |    | Tmax > 6s                    |
|                                         |    | Tmax > 8s                    |
|                                         |    | Tmax > 10s                   |
|                                         |    | Mismatch volume              |
|                                         |    | Mismatch ratio               |
| Treatments                              | 5  | Thrombolysis with rtPA       |
|                                         |    | mTICI                        |
|                                         |    | Onset-to-puncture time       |
|                                         |    | Puncture-to-reperfusion time |
|                                         |    | Onset-to-reperfusion time    |
| Laboratory parameters<br>(preoperative) | 23 | WBC                          |
|                                         |    | RBC                          |
|                                         |    | Platelet                     |
|                                         |    | Neutrophils                  |
|                                         |    | Monocyte                     |
|                                         |    | Lymphocyte                   |
|                                         |    | NLR                          |
|                                         |    | Hemoglobin                   |
|                                         |    | Serum creatinine             |
|                                         |    | eGFR                         |
|                                         |    | Serum glucose                |
|                                         |    | Total protein                |
|                                         |    | Albumin                      |
|                                         |    | Globulin                     |
|                                         |    | AGR                          |
|                                         |    | BUN                          |
|                                         |    | Serum uric acid              |
|                                         |    | PT                           |
|                                         |    | APTT                         |
|                                         |    | TT                           |
|                                         |    | INR                          |

|                                             |                  |
|---------------------------------------------|------------------|
| Laboratory parameters 31<br>(postoperative) | Fibrinogen       |
|                                             | D-dimer          |
|                                             | WBC              |
|                                             | RBC              |
|                                             | Platelet         |
|                                             | Neutrophils      |
|                                             | Monocyte         |
|                                             | Lymphocyte       |
|                                             | NLR              |
|                                             | Hemoglobin       |
|                                             | Serum creatinine |
|                                             | eGFR             |
|                                             | Serum glucose    |
|                                             | Total protein    |
|                                             | Albumin          |
|                                             | Globulin         |
|                                             | AGR              |
|                                             | Cholesterol      |
|                                             | Triglycerides    |
|                                             | LDL              |
|                                             | HDL              |
|                                             | Apolipoprotein A |
|                                             | Apolipoprotein B |
|                                             | BUN              |
|                                             | Serum uric acid  |
|                                             | PT               |
|                                             | APTT             |
| TT                                          |                  |
| INR                                         |                  |
| Fibrinogen                                  |                  |
| D-dimer                                     |                  |
| CRP                                         |                  |
| Hemoglobin A1c                              |                  |

AGR indicates albumin-to-globulin ratio; APTT, activated partial thromboplastin time; ASPECTS, Alberta Stroke Program Early CT Score; BUN, blood urea nitrogen; CBF, cerebral blood flow; CRP, C-reactive protein; DBP, diastolic blood pressure; eGFR, estimated glomerular filtration rate; HDL, low density lipoprotein; INR, international normalized ratio; LDL, low density lipoprotein; mRS, modified Rankin Scale; mTICI, modified Thrombolysis in Cerebral Infarction; NIHSS, National Institutes of Health Stroke Scale; NLR, neutrophil-to-lymphocyte ratio; PT, prothrombin time; RBC, red blood cell; rtPA, tissue-type plasminogen activator; SBP, systolic blood pressure; TIA, transient ischemic attack; Tmax, time to maximum; TOAST, Etiology based on TOAS; TT, thromboplastin time; WBC, white blood cell.

**Supplementary table 2** Mathematical algorithm

| Algorithm         | Parameters                                                                                                                                                                                                                                                                                                                                                                                                                                                                                                                                                                                                                                                                                                                                                                                                                                                                                                                                                                                                                                                                                                                                                                                                                                                                                                                                                                   |
|-------------------|------------------------------------------------------------------------------------------------------------------------------------------------------------------------------------------------------------------------------------------------------------------------------------------------------------------------------------------------------------------------------------------------------------------------------------------------------------------------------------------------------------------------------------------------------------------------------------------------------------------------------------------------------------------------------------------------------------------------------------------------------------------------------------------------------------------------------------------------------------------------------------------------------------------------------------------------------------------------------------------------------------------------------------------------------------------------------------------------------------------------------------------------------------------------------------------------------------------------------------------------------------------------------------------------------------------------------------------------------------------------------|
| <b>Base model</b> |                                                                                                                                                                                                                                                                                                                                                                                                                                                                                                                                                                                                                                                                                                                                                                                                                                                                                                                                                                                                                                                                                                                                                                                                                                                                                                                                                                              |
| AdaBoost          | <pre> AdaBoostClassifier(algorithm='SAMME',                     base_estimator=DecisionTreeClassifier(ccp_alpha=0.0,                                                             class_weight='balanced',                                                             criterion='gini',                                                             max_depth=3,                                                             max_features=0.6227762928159657,                                                             max_leaf_nodes=None,                                                             min_impurity_decrease=0.00033005619051851146,                                                             min_impurity_split=None,                                                             min_samples_leaf=3,                                                             min_samples_split=3,                                                             min_weight_fraction_leaf=0.0,                                                             presort='deprecated',                                                             random_state=25,                                                             splitter='best'),                     learning_rate=0.0075783178873011225, n_estimators=268,                     random_state=25) </pre> |
| LightGBM          | <pre> LGBMClassifier(bagging_fraction=0.5418445065929811, bagging_freq=2,                 boosting_type='gbdt', class_weight='balanced',                 colsample_bytree=1.0, feature_fraction=0.8152051323709875,                 importance_type='split', learning_rate=1.3925872044357878e-06,                 max_depth=-1, min_child_samples=5, min_child_weight=0.001,                 min_split_gain=0.5190237999874658, n_estimators=145, n_jobs=-1,                 num_leaves=122, objective=None, random_state=25,                 reg_alpha=1.0952088538329306e-08,                 reg_lambda=0.0044953289196024235, silent='warn', subsample=1.0,                 subsample_for_bin=200000, subsample_freq=0) </pre>                                                                                                                                                                                                                                                                                                                                                                                                                                                                                                                                                                                                                                          |

XGBoost XGBClassifier(base\_score=0.5, booster='gbtree', colsample\_bylevel=1, colsample\_bynode=1, colsample\_bytree=0.704070548926186, enable\_categorical=False, gamma=0, gpu\_id=-1, importance\_type=None, interaction\_constraints='', learning\_rate=0.0010865433383343915, max\_delta\_step=0, max\_depth=2, min\_child\_weight=4, missing=nan, monotone\_constraints=(), n\_estimators=257, n\_jobs=-1, num\_parallel\_tree=1, objective='binary:logistic', predictor='auto', random\_state=25, reg\_alpha=0.0001441685333959445, reg\_lambda=7.083575404283483e-07, scale\_pos\_weight=2.881820460115147, subsample=0.3914144052351526, tree\_method='auto', use\_label\_encoder=True, validate\_parameters=1, verbosity=0)

Gradient Boosting GradientBoostingClassifier(ccp\_alpha=0.0, criterion='friedman\_mse', init=None, learning\_rate=0.1, loss='deviance', max\_depth=3, max\_features=None, max\_leaf\_nodes=None, min\_impurity\_decrease=0.0, min\_impurity\_split=None, min\_samples\_leaf=1, min\_samples\_split=2, min\_weight\_fraction\_leaf=0.0, n\_estimators=100, n\_iter\_no\_change=None, presort='deprecated', random\_state=25, subsample=1.0, tol=0.0001, validation\_fraction=0.1, verbose=0, warm\_start=False)

Extra trees ExtraTreesClassifier(bootstrap=True, ccp\_alpha=0.0, class\_weight='balanced\_subsample', criterion='entropy', max\_depth=4, max\_features=0.5072151903339681, max\_leaf\_nodes=None, max\_samples=None, min\_impurity\_decrease=4.475863025707312e-09, min\_impurity\_split=None, min\_samples\_leaf=2,

```

min_samples_split=3, min_weight_fraction_leaf=0.0,
n_estimators=154, n_jobs=-1, oob_score=False,
random_state=25, verbose=0, warm_start=False)

Random
forest RandomForestClassifier(bootstrap=True, ccp_alpha=0.0, class_weight='balanced',
criterion='entropy', max_depth=7,
max_features=0.5718824629846555, max_leaf_nodes=None,
max_samples=None,
min_impurity_decrease=3.8484700829623946e-08,
min_impurity_split=None, min_samples_leaf=3,
min_samples_split=7, min_weight_fraction_leaf=0.0,
n_estimators=121, n_jobs=-1, oob_score=False,
random_state=25, verbose=0, warm_start=False)

CatBoost CategoricalBoosting.Classifier(nan_mod=Min, eval_metric=Logloss, Iterations=252,
sampling_frequency=PerTree, leaf_estimation_method=Newton,
grow_policy=SymmetricTree, penalties_coefficient=1,
boosting_type=Plain, model_shrink_mode=Constant,
feature_border_type=GreedyLogSum, bayesian_matrix_reg=0.10000000149011612,
force_unit_auto_pair_weights=False, l2_leaf_reg=2,
random_strength=0.6800507307052612, rsm=1,
boost_from_average=False, model_size_reg=0.5,
pool_metainfo_options={'tags': {}}, Subsample=0.800000011920929,
use_best_model=False, class_names=[0, 1],
random_seed=25, depth=5,
posterior_sampling=False, border_count=254,
class_weights=[1, 2.0810811519622803],
classes_count=0, auto_class_weights=Balanced, sparse_features_conflict_fraction=0,
leaf_estimation_backtracking=AnyImprovement,
best_model_min_trees=1, model_shrink_rate=0,
min_data_in_leaf=1, loss_function=Logloss,

```

learning\_rate=0.0010865433141589165, score\_function=Cosine,  
 task\_type=CPU, leaf\_estimation\_iterations=10,  
 bootstrap\_type=MVS, max\_leaves=32)

#### Final model

PFCML-MT RandomForestClassifier(bootstrap=True, ccp\_alpha=0.0, class\_weight='balanced',  
 criterion='entropy', max\_depth=7,  
 max\_features=0.5718824629846555, max\_leaf\_nodes=None,  
 max\_samples=None,  
 min\_impurity\_decrease=3.8484700829623946e-08,  
 min\_impurity\_split=None, min\_samples\_leaf=3,  
 min\_samples\_split=7, min\_weight\_fraction\_leaf=0.0,  
 n\_estimators=121, n\_jobs=-1, oob\_score=False,  
 random\_state=25, verbose=0, warm\_start=False)

AdaBoost indicates Adaptive Boosting; CatBoost, Categorical Boosting; LightGBM, Light Gradient Boosting Machine; XGBoost, eXtreme Gradient Boosting.

**Supplementary table 3** Patient characteristics in the derivation cohort and temporal validation cohort

|                               | Derivation cohort        |                           |         | Temporal validation cohort |                          |         |
|-------------------------------|--------------------------|---------------------------|---------|----------------------------|--------------------------|---------|
|                               | Good outcome<br>(n = 52) | Poor outcome<br>(n = 111) | P value | Good outcome<br>(n = 20)   | Poor outcome<br>(n = 34) | P value |
| <b>Demographics</b>           |                          |                           |         |                            |                          |         |
| Age, years                    | 65.71 (12.65)            | 73.22 (10.32)             | <0.001* | 66.25 (9.62)               | 73.44 (11.00)            | 0.019*  |
| Male, n(%)                    | 29 (55.77)               | 58 (52.25)                | 0.675   | 12 (60.00)                 | 19 (55.88)               | 0.768   |
| <b>Stroke characteristics</b> |                          |                           |         |                            |                          |         |
| Baseline NIHSS score          | 11 (9-15)                | 16 (13-20)                | <0.001* | 11 (8-14)                  | 16 (13-20)               | 0.003*  |
| Baseline mRS score            | 4 (3-4)                  | 4 (4-5)                   | 0.011*  | 4 (4-4)                    | 4 (4-4)                  | 0.961   |
| Site of occlusion, n (%)      |                          |                           | 0.253   |                            |                          | 0.514   |
| Internal carotid artery       | 13 (25.00)               | 42 (37.84)                |         | 9 (45.00)                  | 13 (38.24)               |         |

|                                                |                        |                        |         |                        |                        |        |
|------------------------------------------------|------------------------|------------------------|---------|------------------------|------------------------|--------|
| M1-middle cerebral artery                      | 27 (51.92)             | 50 (45.05)             |         | 7 (35.00)              | 17 (50)                |        |
| M2-middle cerebral artery or other tributaries | 12 (23.08)             | 19 (17.12)             |         | 4 (20.00)              | 4 (11.76)              |        |
| Etiology based on TOAST, n (%)                 |                        |                        | 0.597   |                        |                        | 0.840  |
| Large artery atherosclerosis                   | 22 (42.31)             | 46 (42.99)             |         | 9 (45.00)              | 14 (41.18)             |        |
| Cardioembolic                                  | 23 (44.23)             | 52 (48.60)             |         | 10 (50.00)             | 16 (47.06)             |        |
| Others                                         | 7 (13.46)              | 9 (8.41)               |         | 1 (5.00)               | 4 (11.76)              |        |
| <b>Comorbidities and lifestyle factors</b>     |                        |                        |         |                        |                        |        |
| Hypertension, n (%)                            | 26 (50.00)             | 82 (73.87)             | 0.003*  | 16 (80.00)             | 28 (82.35)             | 1.000  |
| Diabetes, n (%)                                | 8 (15.38)              | 41 (36.94)             | 0.005*  | 2 (10.00)              | 13 (39.36)             | 0.031* |
| Dyslipidemia, n (%)                            | 18 (34.62)             | 36 (32.43)             | 0.783   | 9 (45.00)              | 10 (29.41)             | 0.247  |
| Atrial fibrillation, n (%)                     | 27 (51.92)             | 66 (59.46)             | 0.365   | 9 (45.00)              | 18 (52.94)             | 0.573  |
| Coronary disease, n (%)                        | 3 (5.77)               | 22 (19.82)             | 0.020*  | 3 (15.00)              | 5 (14.71)              | 1.000  |
| History of TIA or stroke, n (%)                | 9 (17.31)              | 24 (21.62)             | 0.523   | 2 (10.00)              | 5 (14.71)              | 1.000  |
| SBP, mmHg                                      | 139.79 (20.27)         | 138.84 (23.56)         | 0.802   | 131.95 (23.54)         | 144.41 (26.43)         | 0.088  |
| DBP, mmHg                                      | 79.77 (15.09)          | 76.62 (14.40)          | 0.202   | 72.95 (11.05)          | 72.85 (17.71)          | 0.982  |
| Habitual smoking, n (%)                        | 15 (28.85)             | 17 (15.32)             | 0.043*  | 5 (25.00)              | 4 (11.76)              | 0.266  |
| Alcohol assumption, n (%)                      | 12 (23.08)             | 12 (10.81)             | 0.039*  | 5 (25.00)              | 2 (5.88)               | 0.087  |
| <b>Radiological findings</b>                   |                        |                        |         |                        |                        |        |
| ASPECTS                                        | 9 (8-10)               | 8 (8-10)               | 0.112   | 8 (8-9)                | 9 (8-9)                | 0.659  |
| Good collateral status, n (%)                  | 36 (75.00)             | 29 (28.71)             | <0.001* | 12 (63.16)             | 13 (41.94)             | 0.145  |
| CBF < 30%, ml                                  | 0 (0-11.35)            | 6.90 (0-34.90)         | 0.006*  | 6.60 (0-41.50)         | 11.30 (0.68-39.73)     | 0.432  |
| Tmax > 4s, ml                                  | 240.40 (173.85-337.25) | 300.10 (193.20-463.70) | 0.085   | 307.10 (211.60-371.10) | 286.05 (224.85-381.60) | 0.790  |
| Tmax > 6s, ml                                  | 129.05 (83.63-174.48)  | 162.20 (101.10-219.40) | 0.045*  | 155.08 (96.52)         | 162.87 (118.45)        | 0.811  |
| Tmax > 8s, ml                                  | 98.20 (46.45-145.15)   | 132.20 (64.30-190.80)  | 0.048*  | 94.58 (76.63)          | 77.97 (14.24)          | 0.960  |
| Tmax > 10s, ml                                 | 44.35 (7.38-72.43)     | 61.70 (15.20-116.30)   | 0.018*  | 34.00 (5.40-131.80)    | 36.90 (6.90-93.88)     | 0.829  |
| Mismatch volume, ml                            | 114.95 (81.60-168.88)  | 127.40 (84.20-185.90)  | 0.312   | 137.71 (81.57)         | 136.12 (105.28)        | 0.955  |
| Mismatch ratio†                                | 0 (0-0.055)            | 0.064 (0-0.207)        | 0.003*  | 0.058 (0-0.173)        | 0.079 (0.005-0.256)    | 0.326  |
| <b>Treatments</b>                              |                        |                        |         |                        |                        |        |
| Thrombolysis with rtPA, n (%)                  | 18 (34.62)             | 41 (36.94)             | 0.774   | 8 (40.00)              | 12 (35.29)             | 0.729  |



|                                              |                           |                           |         |                           |                           |        |
|----------------------------------------------|---------------------------|---------------------------|---------|---------------------------|---------------------------|--------|
| mTICI (2b-3), n (%)                          | 50 (96.15)                | 95 (86.36)                | 0.058   | 20 (100.00)               | 30 (88.24)                | 0.285  |
| Onset-to-puncture time, min                  | 415.00<br>(270.00-555.75) | 350.00<br>(240.00-550.00) | 0.248   | 335.00<br>(263.00-720.00) | 420.00<br>(310.00-570.00) | 0.414  |
| Puncture-to-reperfusion time, min            | 80 (60-103.75)            | 110.00<br>(90.00-150.00)  | <0.001* | 113.50 (35.14)            | 113.09 (71.40)            | 0.981  |
| Onset-to-reperfusion time, min               | 492.50<br>(340.00-638.00) | 470.00<br>(350.00-705.00) | 0.839   | 450.00<br>(369.00-768.75) | 480.00<br>(390.00-607.50) | 0.738  |
| <b>Laboratory parameters (preoperative)</b>  |                           |                           |         |                           |                           |        |
| WBC, × 10 <sup>9</sup> /L                    | 6.70 (5.38-8.43)          | 7.90 (6.68-9.60)          | 0.001*  | 7.65 (6.00-8.55)          | 8.25 (6.63-9.95)          | 0.184  |
| RBC, × 10 <sup>12</sup> /L                   | 4.37 (0.50)               | 4.45 (0.54)               | 0.486   | 4.66 (0.59)               | 4.19 (0.64)               | 0.016* |
| Platelet, × 10 <sup>9</sup> /L               | 154.50<br>(121.75-204.00) | 191.00<br>(153.50-234.50) | 0.002*  | 198.00<br>(133.00-241.75) | 196.00<br>(145.50-231.50) | 0.753  |
| Neutrophils, × 10 <sup>9</sup> /L            | 4.55 (3.78-6.13)          | 5.45 (4.28-7.73)          | 0.046*  | 5.80 (3.37)               | 7.13 (3.55)               | 0.212  |
| Monocyte, × 10 <sup>9</sup> /L               | 0.50 (0.40-0.60)          | 0.50 (0.40-0.70)          | 0.013*  | 0.59 (0.50)               | 0.53 (0.16)               | 0.500  |
| Lymphocyte, × 10 <sup>9</sup> /L             | 1.40 (1.00-1.70)          | 1.50 (1.10-2.20)          | 0.056   | 1.30 (0.90-2.33)          | 1.25 (0.90-1.68)          | 0.378  |
| NLR                                          | 3.24 (2.82-5.38)          | 3.89 (1.92-6.36)          | 0.991   | 4.38 (2.85)               | 6.61 (4.59)               | 0.073  |
| Hemoglobin, g/L                              | 136.22 (16.52)            | 136.44 (18.76)            | 0.952   | 138.44 (13.61)            | 127.89 (19.24)            | 0.049* |
| Serum creatinine, umol/L                     | 64.50<br>(56.35-72.18)    | 73.95<br>(61.23-95.25)    | 0.001*  | 66.65<br>(55.88-83.58)    | 69.55<br>(46.63-78.28)    | 0.848  |
| eGFR, mL/min/1.73 m <sup>2</sup>             | 93.33 (17.28)             | 77.27 (22.90)             | <0.001* | 88.07 (20.24)             | 86.75 (23.28)             | 0.844  |
| Serum glucose, mmol/L                        | 6.50 (5.75-7.85)          | 7.30 (5.95-9.00)          | 0.033*  | 6.60 (6.00-7.88)          | 8.20 (6.40-10.90)         | 0.138  |
| Total protein, g/L                           | 71.26 (7.50)              | 73.90 (6.89)              | 0.101   | 75.44 (6.22)              | 70.65 (5.90)              | 0.021* |
| Albumin, g/L                                 | 41.01 (3.83)              | 41.07 (4.21)              | 0.943   | 42.51 (3.25)              | 39.78 (3.45)              | 0.019* |
| Globulin, g/L                                | 30.26 (4.62)              | 32.83 (4.71)              | 0.016*  | 32.93 (5.01)              | 30.46 (4.73)              | 0.130  |
| AGR                                          | 1.38 (0.17)               | 1.27 (0.20)               | 0.023*  | 1.32 (0.20)               | 1.31 (0.19)               | 0.882  |
| BUN, umol/L                                  | 5.20 (4.21-6.40)          | 6.18 (5.03-7.66)          | 0.006*  | 6.13 (4.40-7.31)          | 5.95 (5.40-6.49)          | 0.963  |
| Serum uric acid, umol/L                      | 307.09 (78.97)            | 356.11 (92.17)            | 0.003*  | 372.39 (126.97)           | 324.85 (118.44)           | 0.207  |
| PT, s                                        | 12.00<br>(11.30-12.60)    | 11.90<br>(11.10-12.40)    | 0.307   | 12.30<br>(11.60-13.03)    | 12.10<br>(11.60-12.75)    | 0.535  |
| APTT, s                                      | 26.20<br>(24.90-27.75)    | 26.20<br>(24.90-27.50)    | 0.853   | 25.55<br>(24.28-26.65)    | 24.90<br>(23.85-26.90)    | 0.386  |
| TT, s                                        | 18.50<br>(17.65-19.20)    | 18.40<br>(17.30-19.30)    | 0.537   | 17.70<br>(17.25-18.38)    | 17.50<br>(16.80-18.08)    | 0.471  |
| INR                                          | 1.05 (0.99-1.11)          | 1.04 (0.97-1.09)          | 0.242   | 1.07 (1.02-1.14)          | 1.05 (1.01-1.12)          | 0.491  |
| Fibrinogen, g/L                              | 2.70 (2.35-3.00)          | 2.90 (2.40-3.60)          | 0.014*  | 2.95 (2.48-3.53)          | 2.75 (2.43-3.93)          | 0.795  |
| D-dimer, mg/L                                | 0.51 (0.32-1.77)          | 0.89 (0.50-2.17)          | 0.017*  | 0.43 (0.25-1.93)          | 1.24 (0.62-3.28)          | 0.029* |
| <b>Laboratory parameters (postoperative)</b> |                           |                           |         |                           |                           |        |
| WBC, × 10 <sup>9</sup> /L                    | 8.00 (6.00-9.80)          | 10.20<br>(8.10-11.95)     | <0.001* | 8.78 (3.25)               | 10.19 (3.31)              | 0.134  |
| RBC, × 10 <sup>12</sup> /L                   | 4.10 (0.54)               | 4.03 (0.53)               | 0.430   | 4.08 (3.66-4.66)          | 3.85 (3.57-4.41)          | 0.179  |
| Platelet, × 10 <sup>9</sup> /L               | 162.69 (57.02)            | 183.26 (62.34)            | 0.047*  | 172.00<br>(142.25-210.00) | 181.00<br>(137.50-233.50) | 0.788  |
| Neutrophils, × 10 <sup>9</sup> /L            | 6.60 (4.70-8.00)          | 8.20<br>(6.50-10.40)      | <0.001* | 6.50 (5.33-8.23)          | 8.55 (6.78-11.08)         | 0.026* |

|                                  |                         |                        |         |                         |                         |        |
|----------------------------------|-------------------------|------------------------|---------|-------------------------|-------------------------|--------|
| Monocyte, × 10 <sup>9</sup> /L   | 0.40 (0.30-0.60)        | 0.50 (0.40-0.70)       | 0.012*  | 0.40 (0.30-0.58)        | 0.50 (0.38-0.63)        | 0.214  |
| Lymphocyte, × 10 <sup>9</sup> /L | 1.00 (0.70-1.40)        | 0.90 (0.60-1.30)       | 0.328   | 0.90 (0.70-1.30)        | 0.80 (0.50-1.00)        | 0.059  |
| NLR                              | 6.14 (4.56-9.00)        | 8.00<br>(6.01-16.00)   | <0.001* | 6.58<br>(4.90-10.94)    | 11.46 (6.53-17.44)      | 0.005* |
| Hemoglobin, g/L                  | 127.02 (18.92)          | 124.09 (18.93)         | 0.366   | 125.60 (15.70)          | 116.88 (20.27)          | 0.105  |
| Serum creatinine, umol/L         | 63.00<br>(53.00-70.00)  | 73.50<br>(60.00-92.25) | <0.001* | 63.00<br>(59.00-70.50)  | 73.00<br>(52.50-81.00)  | 0.259  |
| eGFR, mL/min/1.73 m <sup>2</sup> | 94.88<br>(88.14-106.61) | 81.19<br>(63.21-93.80) | <0.001* | 99.44<br>(88.81-113.20) | 86.97<br>(72.35-102.23) | 0.017* |
| Serum glucose, mmol/L            | 5.39 (4.73-6.70)        | 6.97 (5.83-9.40)       | <0.001* | 6.07 (5.31-7.19)        | 7.51 (6.12-12.58)       | 0.009* |
| Total protein, g/L               | 62.69 (4.99)            | 62.28 (5.51)           | 0.650   | 62.93 (5.98)            | 62.16 (4.72)            | 0.608  |
| Albumin, g/L                     | 38.93 (2.23)            | 37.03 (3.02)           | <0.001* | 38.57 (3.20)            | 37.67 (3.62)            | 0.365  |
| Globulin, g/L                    | 23.77 (3.88)            | 25.25 (4.00)           | 0.029*  | 23.15<br>(20.60-28.25)  | 24.10<br>(21.75-25.95)  | 0.707  |
| AGR                              | 1.67 (0.25)             | 1.50 (0.25)            | <0.001* | 1.62 (0.25)             | 1.57 (0.27)             | 0.500  |
| Cholesterol, mmol/L              | 4.27 (0.95)             | 4.08 (1.18)            | 0.314   | 4.63 (1.34)             | 4.07 (0.83)             | 0.068  |
| Triglycerides, mmol/L            | 0.92 (0.70-1.43)        | 0.88 (0.70-1.21)       | 0.284   | 0.96 (0.38)             | 1.17 (0.50)             | 0.113  |
| LDL, mmol/L                      | 2.48 (0.75)             | 2.39 (1.03)            | 0.557   | 2.85 (1.22)             | 2.38 (0.71)             | 0.082  |
| HDL, mmol/L                      | 1.22 (0.34)             | 1.20 (0.33)            | 0.712   | 1.21 (0.99-1.39)        | 1.04 (0.90-1.14)        | 0.078  |
| Apolipoprotein A, g/L            | 0.97 (0.18)             | 0.95 (0.19)            | 0.524   | 1.02 (0.17)             | 0.95 (0.17)             | 0.161  |
| Apolipoprotein B, g/L            | 0.75 (0.20)             | 0.71 (0.25)            | 0.304   | 0.81 (0.31)             | 0.71 (0.20)             | 0.133  |
| BUN, umol/L                      | 4.70 (4.05-6.10)        | 6.40 (4.75-7.70)       | <0.001* | 5.15 (3.73-7.45)        | 5.80 (5.00-7.05)        | 0.157  |
| Serum uric acid, umol/L          | 315.33 (88.09)          | 348.55 (91.38)         | 0.030*  | 329.50 (90.95)          | 333.42 (100.31)         | 0.887  |
| PT, s                            | 11.55<br>(11.10-12.20)  | 11.60<br>(11.10-12.40) | 0.231   | 11.70<br>(11.00-12.60)  | 11.70<br>(11.05-12.20)  | 0.864  |
| APTT, s                          | 25.95<br>(24.88-27.38)  | 26.10<br>(25.10-27.30) | 0.736   | 26.40<br>(25.20-27.60)  | 25.20<br>(23.55-26.75)  | 0.067  |
| TT, s                            | 18.45<br>(17.38-19.93)  | 17.90<br>(17.00-19.10) | 0.090   | 17.80<br>(16.80-19.60)  | 17.30<br>(16.55-17.95)  | 0.047* |
| INR                              | 1.01 (0.97-1.07)        | 1.02 (0.97-1.09)       | 0.440   | 1.03 (0.96-1.11)        | 1.03 (0.97-1.07)        | 0.985  |
| Fibrinogen, g/L                  | 2.59 (0.72)             | 2.91 (0.87)            | 0.025*  | 2.10 (1.90-3.00)        | 2.90 (2.30-3.50)        | 0.044* |
| D-dimer, mg/L                    | 1.32 (0.70-2.67)        | 2.45 (1.43-5.44)       | <0.001* | 1.74 (0.63-4.17)        | 3.02 (1.69-4.79)        | 0.074  |
| CRP, mg/L                        | 4.80<br>(2.90-10.48)    | 9.40<br>(4.70-23.40)   | <0.001* | 4.70 (2.40-9.20)        | 11.10 (5.25-23.95)      | 0.039* |
| Hemoglobin A1c, %                | 5.75 (5.50-6.23)        | 5.90 (5.60-6.90)       | 0.040*  | 5.80 (5.53-6.18)        | 6.10 (5.73-7.45)        | 0.033* |

AGR indicates albumin-to-globulin ratio; APTT, activated partial thromboplastin time; ASPECTS, Alberta Stroke Program Early CT Score; BUN, blood urea nitrogen; CBF, cerebral blood flow; CRP, C-reactive protein; DBP, diastolic blood pressure; eGFR, estimated glomerular filtration rate; HDL, low density lipoprotein; INR, international normalized ratio; LDL, low density lipoprotein; mRS, modified Rankin Scale; mTICI, modified Thrombolysis in Cerebral Infarction; NIHSS, National Institutes of Health Stroke Scale; NLR, neutrophil-to-lymphocyte ratio; PT, prothrombin time; RBC, red blood cell; rtPA, tissue-type plasminogen activator; SBP, systolic blood pressure; TIA, transient ischemic attack; Tmax, time to maximum; TOAST, Etiology based on TOAS; TT,

thromboplastin time; WBC, white blood cell.

\*  $p < 0.05$ .

† Since ischemic core volume (CBF < 30%) in a small number of patients is 0 ml, here the mismatch ratio was defined as volume<sub>CBF<30%</sub> / volume<sub>T<sub>max</sub>>6s</sub>.

**Supplementary figure 1** Workflow of the study

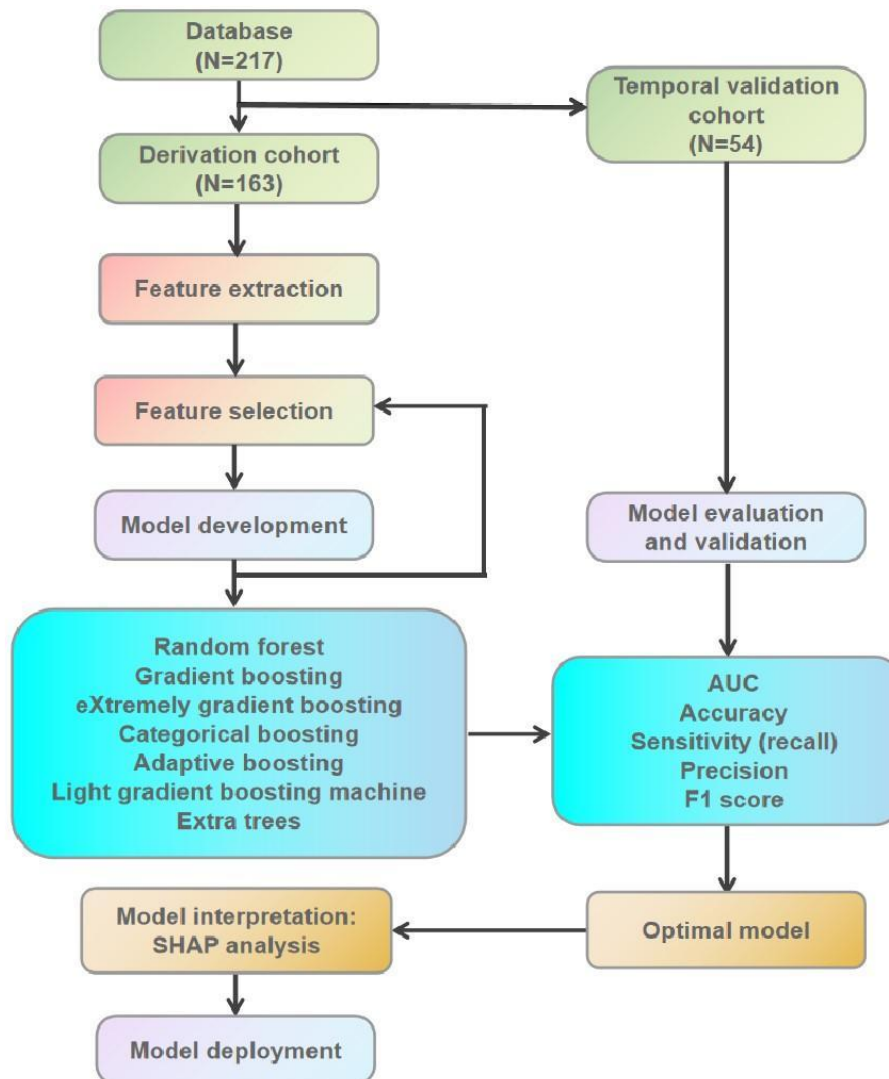

**Supplementary figure 2** SHAP summary plot for the top 30 predictors contributing to the base random forest model

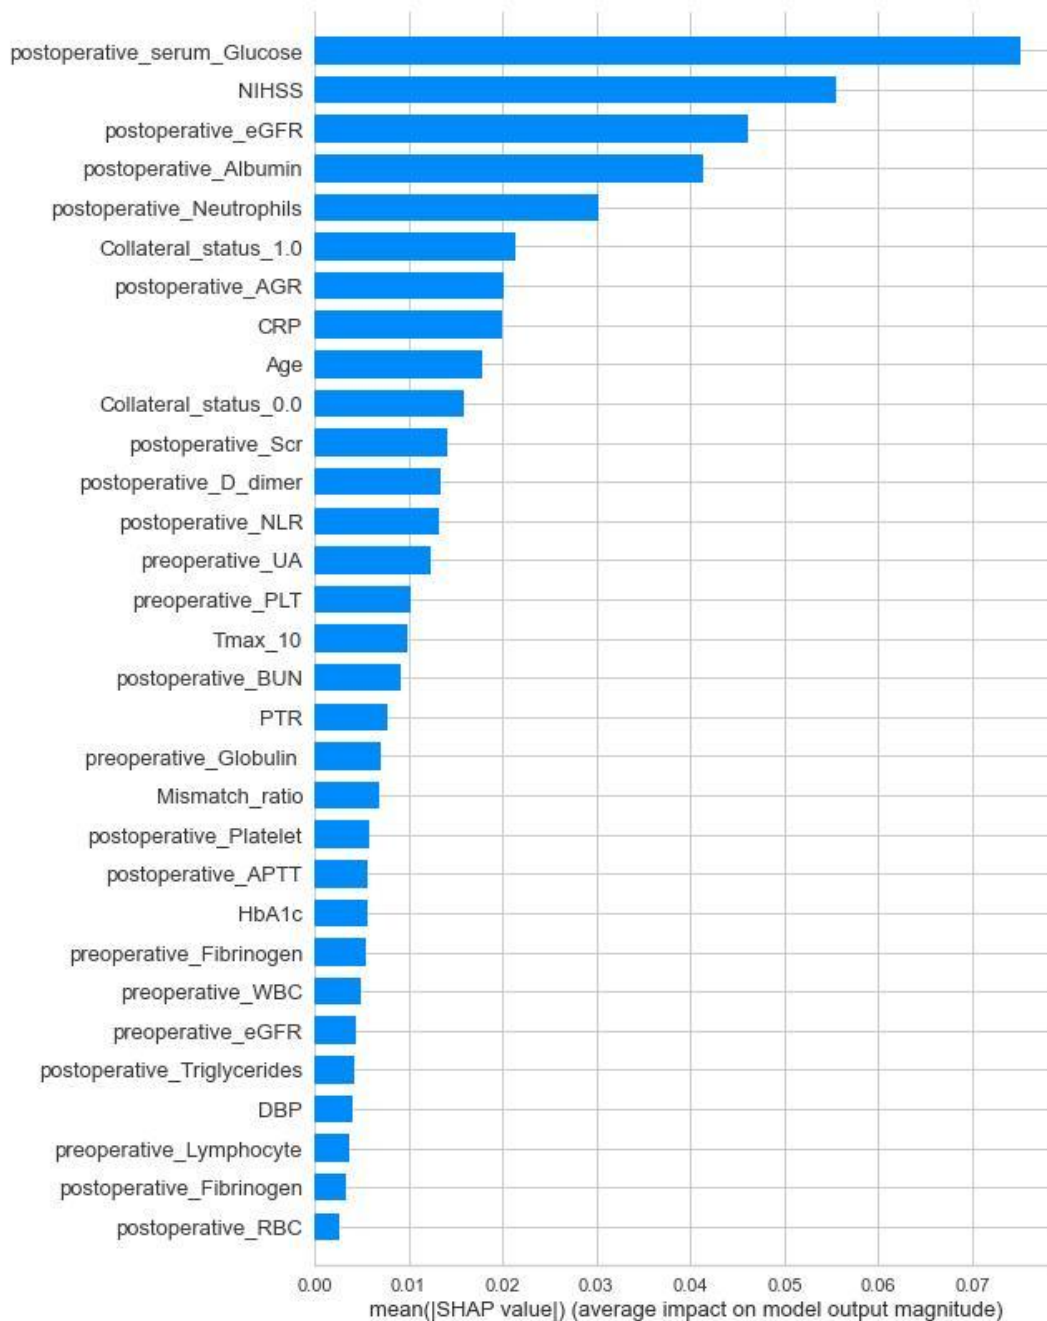

**Supplementary figure 3** Area under the receiver operating characteristic curves in the test set predicting outcome based on ML models with restricted and unrestricted predictors

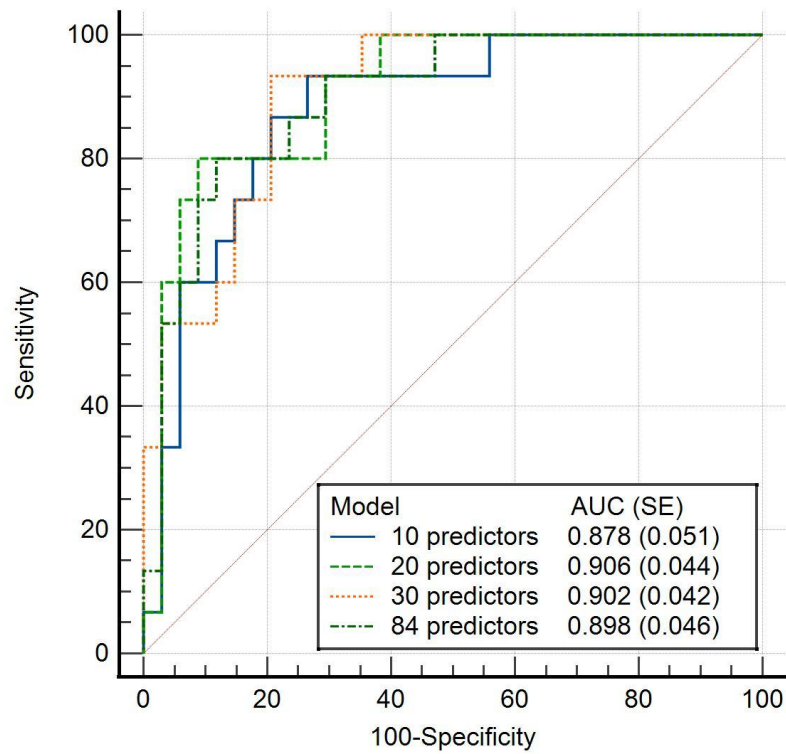

Supplementary figure 4 SHAP dependence plot of the PFCML-MT model

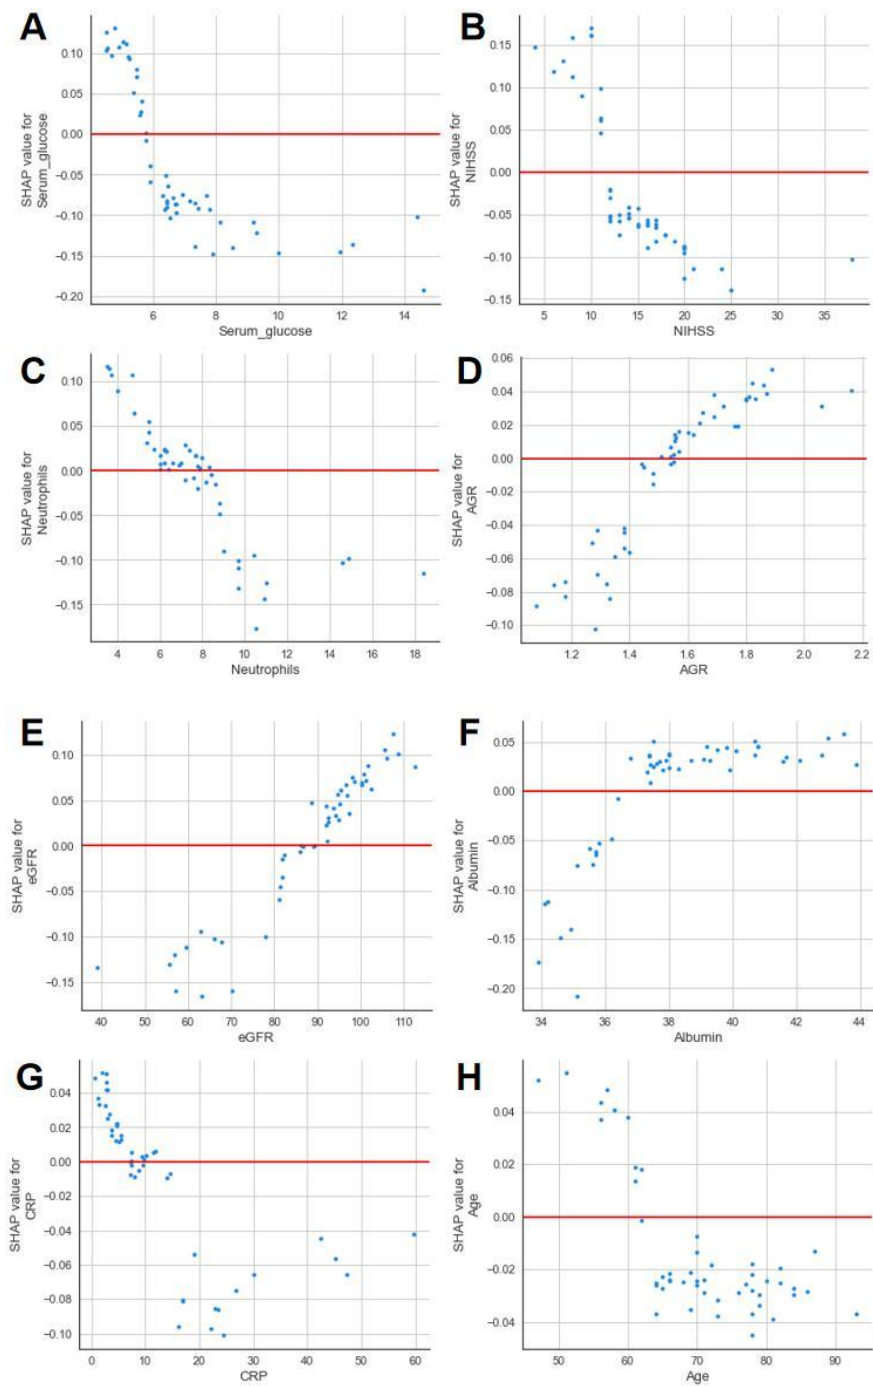

**Supplementary figure 5A and 5B** Force plots for 2 representative subjects with and without functional independence. The features with high impact (SHAP values) are displayed explicitly. (A) An instance with a high possibility of functional independence in which the features shown as red arrows push the odds of the instance (calculated by the prediction model) higher than the average value. (B) An instance with a low possibility of functional independence in which the features shown as blue arrows push the odds of the instance lower than the average value.

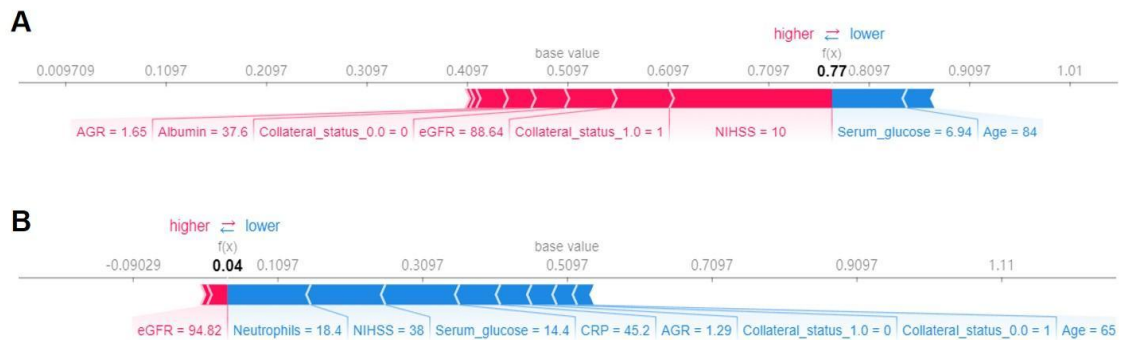

Supplement: jnis-2022-019598supp001_data_supplement.pdf [file jnis-2022-019598supp001_data_supplement.pdf]
